# Supplementary material
Source: Research Square preprint supplement (doi:10.21203/rs.3.rs-9636700/v1)
Supplement: Supplementary file 1 [file 0761931d737d74088b07cad5.docx]

**Phenotypic characterization and pan-genomic analysis of a novel bioflocculant-producing *Stenotrophomonas maltophilia* PT-13 for wastewater treatment**

Linlin Zhang1,2, Shenghui Yang1, Zhaofeng Liu3, Yuqing Li1, Jianjiang Lu1,2*

1. College of Safety and Environmental Engineering, Shandong University of Science and Technology, Qingdao 266590, China
2. Institute of Yellow River Delta Earth Surface Processes and Ecological Integrity, Shandong University of Science and Technology, Qingdao 266510, China
3. National Institute of Low Carbon and Clean Energy, State Key Laboratory of Water Resource Protection and Utilization in Coal Mining, Beijing 102211, China

*Corresponding author: Jianjiang Lu

E-mail: lujianjiang1990@126.com

Table S1. Factors and levels of the Box-Behnken design

| Factor | Group | | Symbol Level | |
| --- | --- | --- | --- | --- |
|  |  | -1 | 0 | 1 |
| Rotational speed (rpm) | A | 200 | 400 | 600 |
| Fermentation supernatant dosage (mL) | B | 3 | 5 | 7 |
| CaCl₂ concentration (mL) | C | 3 | 5 | 7 |

Table S2. ANOVA of the response surface quadratic model for flocculation efficiency

| Source | Sum of squares | Degree freedom | Mean square | F-value | P-value | Significance |
| --- | --- | --- | --- | --- | --- | --- |
| Model | 769.17 | 9 | 85.46 | 30.77 | <0.0001 | Significant |
| A | 128.80 | 1 | 128.80 | 46.37 | 0.0003 | Significant |
| B | 15.40 | 1 | 15.40 | 5.55 | 0.0507 | - |
| C | 177.66 | 1 | 177.66 | 63.97 | <0.0001 | Significant |
| AB | 0.90 | 1 | 0.90 | 0.32 | 0.5865 | - |
| AC | 0.25 | 1 | 0.25 | 0.09 | 0.7729 | - |
| BC | 0.81 | 1 | 0.81 | 0.29 | 0.6059 | - |
| A² | 297.80 | 1 | 297.80 | 107.22 | <0.0001 | Significant |
| B² | 0.99 | 1 | 0.99 | 0.36 | 0.5692 | - |
| C² | 119.84 | 1 | 119.84 | 43.15 | 0.0003 | Significant |
| Residual | 19.44 | 7 | 2.78 | - | - | - |
| Lack of fit | 1.46 | 3 | 0.49 | 0.11 | 0.9507 | Not significant |
| Pure error | 17.98 | 4 | 4.49 | - | - | - |
| Cor total | 788.62 | 16 | - | - | - | - |

Table S3. Monosaccharide composition and content of MBF-PT

| Monosaccharide | Retention time (min) | Mass ratio (%) | Molar ratio (%) |
| --- | --- | --- | --- |
| Arabinose | 9.94 | 3.33 | 3.83 |
| Rhamnose | 9.39 | 31.44 | 33.06 |
| Glucose | 14.68 | 23.13 | 22.17 |
| Mannose | 18.61 | 19.40 | 18.59 |
| Ribose | 23.55 | 5.76 | 6.62 |
| Galactosamine | 8.72 | 5.68 | 5.48 |
| Glucosamine | 11.28 | 3.21 | 3.09 |
| Glucuronic acid | 36.74 | 8.04 | 7.15 |
